# Supplementary material
Source: PubMed Central journal article supplement (PMC8858037)
Supplement: EMS140808-supplement-Supplementary_material.pdf [file EMS140808-supplement-Supplementary_material.pdf]

Supplementary table 1: Event Rates and multivariate Cox Proportional Hazards Models for baseline Pro-NT as continuous variable in relation to Cause-Specific Mortality.

|                                | <b>All participants</b> | <b>Pro-NT (per standard deviation increment)</b> | <b><i>P value</i></b> |
|--------------------------------|-------------------------|--------------------------------------------------|-----------------------|
| All-cause mortality            | <b>4478/1823</b>        | <b>1.07(1.03-1.12)</b>                           | <b>&lt;0.001</b>      |
| Cardiovascular diseases        | 4478/562                | <b>1.13 (1.06-1.22)</b>                          | <b>&lt;0.001</b>      |
| Gastrointestinal diseases      | 4478/42                 | 1.29 (1.06-1.56)                                 | <b>0.010</b>          |
| Mental and behavioral diseases | 4478/89                 | 0.95(0.75-1.20)                                  | <b>0.66</b>           |
| Unspecific diseases            | 4478/62                 | 1.18(0.97-1.44)                                  | <b>0.10</b>           |

Adjusted for age, sex, BMI (body mass index), LDL-C (low-density lipoprotein cholesterol), HDL-C (high-density lipoprotein cholesterol), diabetes, smoking, systolic blood pressure and antihypertensive treatment.

Supplementary Table 2: Event Rates and multivariate Cox Proportional Hazards Models for baseline Pro-NT in relation to Cause-Specific Mortality in Quartile 4 vs Quartile 1.

|                                 | <b>All participants</b> | <b>Quartile 1</b> | <b>Quartile 4</b> | <b>P value</b> |
|---------------------------------|-------------------------|-------------------|-------------------|----------------|
| All-cause mortality             | 4478/1823               | ref               | 1.23 (1.09-1.40)  | <i>0.001</i>   |
| Cardiovascular diseases         | 4478/562                | ref               | 1.39 (1.11-1.76)  | <i>0.005</i>   |
| Gastrointestinal diseases       | 4478/42                 | ref               | 3.35 (1.32-8.49)  | <i>0.011</i>   |
| Mental and behavioural diseases | 4478/89                 | ref               | 1.23 (0.72-2.12)  | <i>0.449</i>   |
| Unspecific diseases             | 4478/62                 | ref               | 2.13 (1.05-4.32)  | <i>0.037</i>   |

Adjusted for age, sex, BMI (body mass index), LDL-C (low-density lipoprotein cholesterol), HDL-C (high-density lipoprotein cholesterol), diabetes, smoking, systolic blood pressure and antihypertensive treatment

Supplementary Table 3: Event Rates and multivariate Cox Proportional Hazards Models for baseline Pro-NT in relation to Cause-Specific Mortality in Quartile 4 vs Quartile 1-3 including additional adjustment for HOMA-IR (insulin resistance) and MDRD (eGFR).

|                                | <b>All participants</b> | <b>Quartile 4 vs Quartile 1-3</b> | <b><i>P value</i></b> |
|--------------------------------|-------------------------|-----------------------------------|-----------------------|
| All- cause mortality           | 4478/1823               | 1.20 (1.08-1.33)                  | <b><i>0.001</i></b>   |
| Cardiovascular diseases        | 4478/540                | 1.29 (1.07-1.56)                  | <b><i>0.008</i></b>   |
| Gastrointestinal diseases      | 4478/41                 | 2.07 (1.10-3.92)                  | <b><i>0.025</i></b>   |
| Mental and behavioral diseases | 4478/86                 | 1.57 (0.99-2.49)                  | <b><i>0.055</i></b>   |
| Unspecific diseases            | 4478/60                 | 1.65 (0.96-2.84)                  | <b><i>0.070</i></b>   |

Adjusted for age, sex, BMI (body mass index), LDL-C (low-density lipoprotein cholesterol), HDL-C (high-density lipoprotein cholesterol), diabetes, smoking, systolic blood pressure and antihypertensive treatment, HOMA and MDRD.
